# Supplementary material for: A novel synthetic microfiber with controllable size for cell encapsulation and culture
Source: Royal Society of Chemistry journal article supplement (doi:10.1039/c6tb00209a), 2016-01-01
Supplement: c6tb00209a1.pdf [file c6tb00209a1.pdf]

*Supporting information for*

A Novel Synthesis Microfiber with Controllable Size for

Cell Encapsulation and Culture

Fang Wu,<sup>a</sup> Xiao-Jie Ju,<sup>\*ab</sup> Xiao-Heng He,<sup>a</sup> Ming-Yue Jiang,<sup>a</sup> Wei Wang,<sup>a</sup>

Zhuang Liu,<sup>a</sup> Rui Xie,<sup>a</sup> Bin He<sup>\*c</sup> and Liang-Yin Chu<sup>\*abd</sup>

---

<sup>a.</sup> School of Chemical Engineering, Sichuan University, Chengdu, Sichuan 610065, P. R. China.

<sup>b.</sup> State Key Laboratory of Polymer Materials Engineering, Sichuan University, Chengdu, Sichuan 610065, P. R. China.

<sup>c.</sup> National Engineering Research Center for Biomaterials, Sichuan University, Chengdu, Sichuan 610065, P. R. China.

<sup>d.</sup> Jiangsu National Synergetic Innovation Center for Advanced Materials (SICAM), Nanjing, Jiangsu 211816, P. R. China

Email: [juxiaojie@scu.edu.cn](mailto:juxiaojie@scu.edu.cn) (X.-J. Ju), [bhe@scu.edu.cn](mailto:bhe@scu.edu.cn) (B. He), [chuly@scu.edu.cn](mailto:chuly@scu.edu.cn) (L.-Y. Chu)

*Supplementary Figures s1-s2*

*Captions for Supplementary Movies s1-s2*

Supplementary Figures s1-s2

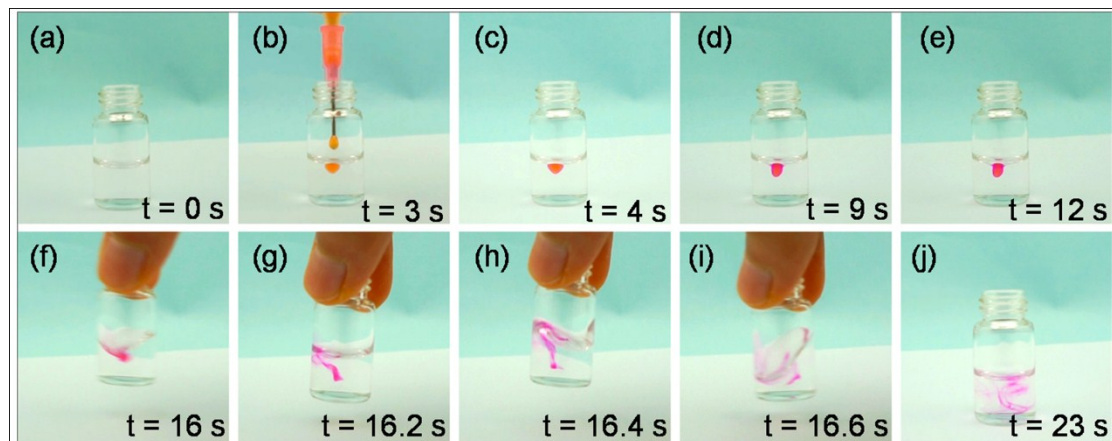

**Fig. s1.** The crosslinking process of PEG-4Mal prepolymer in solution without TEA. The drop contains PEG-4Mal polymers and phenol red, and the solution in the bottle consists of DTT and CMC-Na.

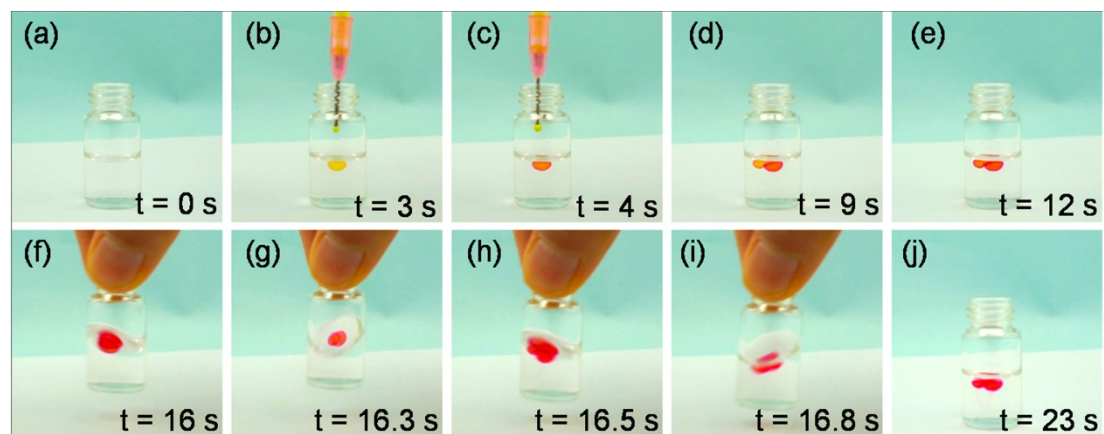

**Fig. s2.** The crosslinking process of PEG-4Mal prepolymer in solution with TEA. The drop contains PEG-4Mal polymers and phenol red, and the solution in the bottle consists of DTT, TEA and CMC-Na.

***Captions for Supplementary Movies s1-s2***

**Movie s1.** The crosslinking process of PEG-4Mal prepolymer in solution without TEA.

**Movie s2.** The crosslinking process of PEG-4Mal prepolymer in solution with TEA.
